# Supplementary material for: O-GlcNAc Transferase – An Auxiliary Factor or a Full-blown Oncogene?
Source: Oxford University Press journal article supplement (doi:10.1158/1541-7786.mcr-20-0926), 2021-01-20
Supplement: 15417786mcr200926-sup-254059_2_supp_6797298_qlkz5t.xlsx [file 15417786mcr200926-sup-254059_2_supp_6797298_qlkz5t.xlsx]

## Sheet: Sheet2
Tissue type	Specific cancer	OGT	OGA	O-GlcNAc	Reference
Digestive system	Colorectal cancer	Elevated, poor survival	na	na	PMID: 30484950
	Colorectal cancer	Elevated	na	Elevated	PMID: 31202709
	Colorectal cancer	Elevated	na	na	PMID: 30715269
	Colon cancer	Elevated	Elevated	na	PMID: 31501520
	Colorectal cancer	Elevated	Not affected	Elevated	PMID: 30093632
	Colorectal cancer	Elevated	na	na	PMID: 29680296
	Colorectal cancer	Elevated	Lower	Elevated	PMID: 21255644
	Colorectal cancer	Elevated	Elevated	Elevated	PMID: 25000257
	Colorectal cancer	Elevated	Elevated	Elevated	PMID: 24126823
	Primary colorectal cancer	Elevated	na	Elevated	PMID: 26724145
	Metastatic colorectal cancer	Decreased	na	Decreased	PMID: 26724145
	Cholangiocarcinoma	Elevated, poor survival	Lower	Elevated	PMID: 23480751
	Cholangiocarcinoma	Elevated	na	Elevated	PMID: 29915392
	Pancreatic cancer	Elevated	Elevated	Elevated	PMID: 30037904
	Pancreatic cancer	Elevated	na	na	PMID: 31281487
	Pancreatic cancer	Elevated, poor survival	na	na	PMID: 28628081
	Pancreatic cancer	Elevated	na	na	PMID: 23592772
	Liver cancer	Elevated	na	na	PMID: 28347804
	Liver cancer	Elevated	na	na	PMID: 31076402
	Liver cancer	Elavated	Lower, poor survival	Elevated, poor survival	PMID: 21461968
	Liver cancer	Elevated	na	na	PMID: 27060025
	Liver cancer	Elevated, poor survival	na	Elevated	PMID: 27751836
	Hepatoma	Elevated	na	Elevated	PMID: 30677218
	Hepatoblastoma	Elevated	na	Elevated	PMID: 31637018
	Gastric	Elevated	na	na	PMID: 30052810
	Gastric	Elevated	na	na	PMID: 26397041
	Gastric	na	na	Elevated	PMID: 27542217
Genital system	Ovarian cancer	Elevated	na	na	PMID: 30052810
	Ovarian cancer	Elevated	na	na	PMID: 26831658
	Ovarian cancer	Elevated	Lower	Lower	PMID: 27402830
	Ovarian cancer	Elevated	na	Elevated	PMID: 27331873
	Endometrial carcinoma	Elevated	Elevated	na	PMID: 22384635
	Chemoresistant ovarian cancer	Lower	na	Lower	PMID: 30555541
	HPV-associated cervical cancer	Elevated	Not affected	Elevated	PMID: 27482104
	Cervical cancer	Elevated	na	Elevated	PMID: 29435130
	Prostate cancer	Elevated	na	na	PMID: 22275356
	Prostate cancer	Elevated	na	Elevated	PMID: 23720054
	Prostate cancer	na	na	Elevated	PMID: 24366413
	Prostate cancer	Elevated	na	na	PMID: 28714959
Breast	Breast cancer	Elevated	Elevated	na	PMID: 31501520
	Breast cancer	Elevated	na	na	PMID: 30052810
	Breast cancer	na	na	Elevated	PMID: 28929346
	Breast cancer	Elevated, poor survival	Lower, poor survival	na	PMID: 21567137
	Breast cancer	Elevated	na	Elevated	PMID: 23576270
	Metastatic breast cancer	Elevated	na	Elevated	PMID: 26374642
Respiratory system	Lung cancer	Elevated	Elevated	na	PMID: 31501520
	Lung cancer	Elevated	na	na	PMID: 30052810
	Lung cancer	Elevated, poor survival	Elevated, poor survival	Elevated, poor survival	PMID: 30123425
	Lung cancer	Elevated	Lower	Elevated	PMID: 21255644
	Laryngeal cancer	Elevated	Elevated	na	PMID: 25315705
Urinary system	Renal cell carcinoma	Elevated, poor survival	na	na	PMID: 30962710
	Bladder cancer	Elevated	Not affected	na	PMID: 22783592
	Bladder cancer	Elevated	na	Elevated	PMID: 30453909
Lymphoma	Mantle cell lymphoma	na	Elevated, poor survival	na	PMID: 29167312
Leukemia	Acute myeloid leukemia	na	na	Elevated	PMID: 30082471
	Pre-B acute lymphocytic leukemia	Elevated	Lower	Elevated	PMID: 28670495
	Diffuse large B-cell lymphoma	Elevated, poor survival	na	na	PMID: 27716624
Oral cavity & pharynx	Oral squamous cell carcinoma	Not affected	na	Not affected	PMID: 29327476
Other unspecified primary site	Epithelioid Tumor	OGT-FOXO3 fusion	na	na	PMID: 31567281
